1     **Application of Pharmacogenomics and Bioinformatics to**  
2     **Exemplify the Utility of Human *ex vivo* Organoculture**  
3     **Models in the Field of Precision Medicine.**

4     Cowan K<sup>1\*</sup>, Macluskie G<sup>1</sup>, Finch M<sup>1</sup>, Palmer C.N.A<sup>2</sup>, Hair J<sup>3</sup>, Bylesjo M<sup>4</sup>, Lynagh S<sup>4</sup>, Brankin P<sup>5</sup>,  
5     McNeil M<sup>6</sup>, Low C<sup>6</sup>, Mallinson D<sup>7</sup>, Gourlay EM<sup>7</sup>, Child H<sup>6</sup>, Cheyne L<sup>6</sup> and Bunton DC<sup>1</sup>.

6     1. REPROCELL Europe Ltd, Thomson Pavilion, Glasgow, UK. 2. School of Medicine, University of Dundee,  
7     Ninewells Hospital and Medical School, Dundee, UK. 3. NHS Greater Glasgow & Clyde, Queen Elizabeth  
8     University Hospital, Glasgow. 4. Fios Genomics Ltd, Nine Edinburgh Bioquarter, Edinburgh, UK 5. Aridhia  
9     Informatics Ltd Teaching and Learning Building, Queen Elizabeth University Hospital, Glasgow, UK 6. Stratified  
10    Medicines Scotland Innovation Centre, Teaching and Learning Building, Queen Elizabeth University Hospital,  
11    Glasgow, UK 7. Sistemic Ltd, West of Scotland Science Park, Glasgow, UK

12    \* Corresponding author: karen.cowan@reprocell.com

13    **Abstract**

14    Here we describe a collaboration between industry, the National Health Service (NHS) and  
15    academia that sought to demonstrate how early understanding of both pharmacology and  
16    genomics can improve strategies for the development of precision medicines. Diseased tissue  
17    ethically acquired from patients suffering from chronic obstructive pulmonary disease  
18    (COPD), was used to investigate inter-patient variability in drug efficacy using *ex vivo*  
19    organocultures of fresh lung tissue as the test system. The reduction in inflammatory cytokines  
20    in the presence of various test drugs was used as the measure of drug efficacy and the individual  
21    patient responses were then matched against genotype and microRNA profiles in an attempt to  
22    identify unique predictors of drug responsiveness. Our findings suggest that genetic variation  
23    in CYP2E1 and SMAD3 genes may partly explain the observed variation in drug response.

## 24 **Introduction**

25 It is well recognised that one size does not fit all when it comes to the treatment of many  
26 diseases. Getting the right drug to the right patient at the right dose has become the focus of  
27 precision medicine, which provides hope that patients may receive the most appropriate  
28 treatment sooner, improving their quality of life and reducing the support required from health  
29 care systems and wider society<sup>1</sup>. Health economists are recognising the potential of precision  
30 medicine and are beginning to apply the concept to their research.<sup>2</sup>

31 The genomics revolution has underpinned much of this research. As the cost of gene  
32 sequencing has fallen, the ability to rapidly identify an individual's genotype as part of routine  
33 health care has become possible. However, for precision medicines to be developed, genomics  
34 must be linked to pharmacology: relating the individuals genotype to the effectiveness, potency  
35 and tolerability of a drug. It is through pharmacogenomics that truly personalised therapies  
36 may emerge, yet the link between genomics and pharmacology may not be properly understood  
37 until expensive  
38 and risky clinical trials are conducted.

39 Here we describe a collaboration between industry, the National Health Service (NHS) and  
40 academia that sought to demonstrate how early understanding of both pharmacology and  
41 genomics can improve strategies for the development of precision medicines. By using the  
42 latest pharmacology techniques in human fresh tissues from the target patient population,  
43 combined with genomics and clinical metadata associated with each individual, an improved  
44 understanding of the link between genetics and inter-individual drug responses emerges.

45 An early understanding of patient stratification during drug discovery is becoming increasingly  
46 important. Selection and optimisation of candidate drugs for well-defined patient subsets has  
47 the potential to help in the design of more rapid, targeted clinical trials.

48 A key incentive to better understand pharmacogenomics during the drug discovery process is  
49 the rapid increase in drug development costs. The most recent estimates of the out-of-pocket  
50 costs (i.e. excluding capital costs) of drug development are in the region of \$890m<sup>7</sup>, with  
51 approximately 70% of the costs incurred during clinical development. The most common cause  
52 of failure is poor efficacy at phase II or III<sup>3,4,5,6</sup>, which is in part attributed to trials of entire  
53 patient populations that include both “responders” and “non-responders”. Precision medicine  
54 can improve the prediction of clinical efficacy by selecting for clinical trials only those patient  
55 sub-populations likely to gain clear benefit; such predictions are dependent on the quality of  
56 the information used to stratify the patient sub-populations at an early stage of development.  
57 Early data on the effectiveness of drugs in different patients is essential to the development of  
58 precision medicines. Pre-clinical tests of drug effects must therefore closely reflect the patient  
59 population.

60 The most desired traits in pre-clinical models are “physiological relevance” and the ability to  
61 translate findings to likely clinical responses<sup>3,7,6,8</sup>, including a desire to model the likely  
62 variation in effectiveness of a new drug within the patient population. Human fresh tissues and  
63 complex 3D tissue models that reflect the biology of disease are therefore increasingly being  
64 used by Pharma to improve the prediction of efficacy in clinical trials<sup>7,9,10</sup>. Although the data  
65 between different patients can be variable, this is now viewed as an opportunity for an early  
66 understanding of the extent and causes of inter-patient variation in drug response.

67 Chronic Obstructive Pulmonary Disease (COPD) is a major health problem and is an example  
68 of a complex condition, with many clinical phenotypes. Many patients receive minimal clinical

69 benefit from common medications, most likely due to the combination of variations in disease  
70 subtype and genotype. The clinical variation in drug response is apparent in *ex vivo*  
71 pharmacology experiments using fresh lung tissues<sup>29</sup>.

72 In this project, diseased tissue ethically acquired from patients suffering from COPD, was used  
73 to investigate inter-patient variability in drug efficacy using *ex vivo* organocultures of fresh  
74 lung tissue as the test system. In order to assess patient variation and responsiveness to both  
75 ‘standard of care’ and potential novel therapies, the reduction in inflammatory cytokines in the  
76 presence of various test drugs was used as the measure of drug efficacy. The individual patient  
77 responses were then matched against genotype and microRNA profiles in an attempt to identify  
78 unique predictors of drug responsiveness and demonstrate the combined power of  
79 pharmacology and genomics during pre-clinical development.

80

81 **Figure 1. Diagram describing the precision medicine ecosystem in Scotland**

## 82 **Materials and methods**

### 83 **Organoculture - REPROCELL**

#### 84 **Materials**

85 RPMI 1640 glutamax culture medium, gentamicin (50 mg/ml) and amphotericin B (250 µg/ml)  
86 were purchased from Thermo Fisher Scientific. Retinyl acetate, nystatin, bovine insulin, foetal  
87 bovine serum (FBS), fluticasone, roflumilast, RNAlater and DMSO were purchased from  
88 Sigma. Formoterol was purchased from R&D Systems and lipopolysaccharide endotoxin  
89 (LPS) was purchased from Invivogen. Complete mini protease inhibitor was purchased from  
90 Roche.

91 Method

92 COPD lung parenchyma tissue was ethically obtained from 25 patients undergoing therapeutic  
93 resection for cancer or COPD. Residual tissue, not required for diagnosis, was acquired from  
94 NHS Research Scotland Bio-repository Network and also through the REPROCELL tissue  
95 network. Patients provided written consent, complying with the declaration of Helsinki.

96 Lung parenchyma was dissected free from pleura, visible airways and blood vessels to produce  
97 5 mm<sup>3</sup> biopsies. Two biopsies were immediately placed in RNAlater and stored at 2 to 8°C  
98 overnight, prior to storage at -80°C. Remaining biopsies were subjected to the following  
99 culture protocol.

100 RPMI 1640 culture medium was prepared by adding the following constituents: gentamicin  
101 (100 µg/ml), amphotericin B (0.625 µg/ml), FBS (0.5%), retinyl acetate (0.1 µg/ml), bovine  
102 insulin (1 µg/ml) and nystatin (1 µg/ml). Final concentration of each constituent is displayed.  
103 Biopsies were submerged in culture media (two biopsies per well) and incubated for 16 to 24h  
104 at 37 °C, in the presence of 5% CO<sub>2</sub>.

105 Following the incubation period, media was refreshed and each well containing two biopsies  
106 was exposed to LPS (100 ng/ml), in an attempt to boost and normalise inter-biopsy  
107 inflammatory cytokine release. Each well was assigned one of the following experimental  
108 conditions: DMSO vehicle; roflumilast (100 nM); fluticasone (1 µM); formoterol (10 nM); or  
109 a combination of roflumilast (100 nM) plus fluticasone (1 µM) or formoterol (10 nM). Biopsies  
110 were then subjected to a further incubation period of 24 h at 37 °C in the presence of 5% CO<sub>2</sub>.  
111 Culture supernatants were sampled from each well, protease inhibitor added to prevent  
112 degradation of inflammatory cytokines and stored at -80°C prior to analysis.

113 Each experimental condition was performed in duplicate culture wells.

114 Luminex MAGPIX Analysis

115 Levels of TNF $\alpha$  (pg/ml) were measured in culture supernatants using a magnetic bead-based  
116 assay for the Luminex MAGPIX platform. Fluorescence levels correlating with TNF $\alpha$  level  
117 were corrected against the blank control level and a standard curve was generated using a 5-  
118 parameter logistic equation.

119 Each culture supernatant sample was analysed in duplicate and reported by Bio plex Manager  
120 6.1 software as mean TNF $\alpha$  concentration (pg/ml), along with standard deviation of the mean  
121 and the percentage coefficient of variation.

122 Graph Pad Prism 4 software was used to display the data for all 25 donors as a median or mean  
123 TNF $\alpha$  concentration (pg/ml) + Standard Error of Mean (SEM.).

124 Median and mean TNF $\alpha$  concentration was also displayed in Graph Pad Prism 4 as a percentage  
125 of DMSO vehicle control.

126 **RNA, DNA extraction and miRNA analysis – Sistemic**

127 Two baseline lung biopsies were prepared from 25 donors, as described above, and transported  
128 to Sistemic for DNA and RNA extraction.

129 DNA was extracted from approximately 10 mg tissue using the PureLink Genomic DNA Mini  
130 Kit (Life Technologies). DNA quality control was performed using the Agilent 2200  
131 TapeStation and the Genomic DNA ScreenTape kit to determine the DNA integrity number  
132 (DIN).

133 RNA was extracted from approximately 10 mg tissue. Tissue was homogenised in lysis buffer  
134 using a Precellys 24 homogeniser (Bertin Technologies) and total RNA was then extracted  
135 using the miRCURY RNA Isolation Kit – Cell & Plant (Exiqon). Absorbance ratios at 260/280  
136 nM and 260/230 nM were determined as indicators of sample yield and purity.

137 Further RNA quality control was performed using the Agilent 2200 TapeStation and the  
138 ScreenTape R6K kit to determine the RNA integrity number (RIN).

139 MicroRNA (miRNA) expression levels were measured using the Agilent miRNA platform,  
140 specifically; Agilent's SurePrint G3 Human v16 microRNA 8x60K microarray slides,  
141 miRBase version 16.0. Each slide contained 8 individual arrays and each array represents 1,349  
142 microRNA's; 1205 human miRNAs (mapped to 1194 miRNAs in miRBase 20) and 144 viral  
143 miRNAs.

144 Data was normalised using the AgiMicroRNA package in Bioconductor<sup>11</sup>. Array quality  
145 control was performed using outlier testing based on the following: average signal per array;  
146 average background per array; percentage of miRNAs where expression is detected on each  
147 array and the data distribution of each sample.

148 A sample to sample correlation analysis was performed on normalised data using Pearson's  
149 correlation. Outliers were assessed using Grubbs' outlier test with a significance threshold of  
150  $p < 0.05$ <sup>12</sup>.

151 miRNA expression data was visualised by Principal Component Analysis<sup>13</sup>, Pearson  
152 correlation and by agglomerative clustering heat-map in Bioconductor<sup>14</sup>.

153 Isolated DNA was transported from Sitemic to the Stratified Medicine Scotland Innovation  
154 Centre (SMS-IC).

### 155 **Exome Sequencing – SMS-IC**

156 Targeted next generation sequencing libraries were prepared using the Ion Ampliseq<sup>TM</sup> Exome  
157 RDY Kit and DNA isolated from baseline lung biopsies. 60,496,505 bases were targeted by  
158 293,903 amplicons, representing the coding sequence of 18,835 genes. Multiplexed PCR was  
159 performed to produce barcoded libraries, using 100ng of input DNA per sample and 10  
160 amplification cycles. The Ion AmpliSeq<sup>TM</sup> Library Kit Plus and IonXpress<sup>TM</sup> Barcode Adapters

161 were used in library preparation, according to the manufacturer's instructions. Final library  
162 concentrations were determined by quantitative real time PCR using the Ion Library TaqMan™  
163 Quantitation Kit. Libraries were diluted to 100pM, and 2 libraries were subsequently pooled in  
164 equal amounts for templating on the Ion OneTouch™ 2 System, using the Ion PI™ Hi-Q™  
165 OT2 200 kit. The Ion Proton™ NGS platform was used for sequencing of multiplexed  
166 templated libraries, using the Ion PI™ Hi-Q™ Sequencing 200 Kit and the Ion PI™ Chip Kit  
167 v3, according to the manufacturer's instructions.

### 168 **Raw Data Storage and Analysis – Aridhia & Fios Genomics**

169 Raw data (organoculture TNF $\alpha$  response levels, miRNA expression profiles and exome  
170 sequencing data) was uploaded to a secure workspace (AnalytiXagility) in Aridhia's digital  
171 research platform.

172 Anonymised, patient demographic data, obtained from NHS Research Scotland Bio-repository  
173 Network or the REPROCELL tissue network was also uploaded to the collaboration's  
174 AnalytiXagility workspace. Data could then be accessed and analysed in a secure manner by  
175 authorised users.

176 Fios Genomics accessed data held in the AnalytiXagility research workspace to provide  
177 bioinformatic analyses. Each dataset was analysed individually and combined to determine any  
178 significant correlations between patient demographic data, genetic polymorphisms and/or  
179 miRNA profiles and the observed organoculture assay response.

### 180 **Organoculture bioinformatic analysis**

181 TNF $\alpha$  levels determined for each patient sample in the organoculture assay, were subjected to  
182 quality control metrics from the ArrayQualityMetrics package in Bioconductor<sup>15</sup>. Assays were  
183 scored on the basis of the following parameters: maplot; boxplot and heatmap. An individual  
184 patient sample was classified as an outlier if two or more of the parameters were not met.



185 TNF $\alpha$  levels (pg/ml) for each experimental condition were normalised using log<sub>2</sub> ratios against  
186 DMSO vehicle control. Relative levels of TNF $\alpha$  were then visualised using bar charts, density  
187 plots and correlation plots within R software. The aim was to identify subgroups of patients  
188 that displayed a good reduction of TNF $\alpha$  levels in response to one or more of the organoculture  
189 experimental conditions and subgroups of patients that displayed a poor reduction.

190 Patients were then categorised as being a high responder or a low responder for use in  
191 subsequent bioinformatics analyses.

192 Defined patient demographic parameters and organoculture assay response were assessed using  
193 pair-wise univariate associations between all combinations of defined parameters. Associations  
194 between categorical parameters were assessed using a chi-squared test; associations between  
195 one categorical and one continuous parameter were assessed using analysis of variance  
196 (ANOVA); associations between two continuous parameters were assessed using a Spearman  
197 correlation test.

198 Exome sequence bioinformatic analysis

199 Torrent Mapping Alignment Program was used to provide IonTorrent AmpliSeq exome  
200 sequencing data for each patient. Data was provided as a BAM file aligned to genome  
201 reference GRCh37. Genotypes called with Torrent Variant Caller were provided as per sample  
202 VCF files.

203 Single nucleotide polymorphisms (SNPs) from the VCF files were merged into a multi-sample  
204 VCF and BAM files were used to set missing genotypes to homozygous reference if the read-  
205 depth of the SNP in a particular sample was less than 30. VCF files were then filtered to remove  
206 low quality SNPs.

207 Exploratory analysis was first performed by producing principal component analysis plots,  
208 using the SNPRrelate R software package. Hierarchical clustering of the data measured  
209 dissimilarity between patient exome data<sup>16</sup>.

210 The genotype for all SNPs identified from the VCF file was tested for association with the  
211 organoculture assay response, this was performed using fisher-exact tests of association within  
212 the Plink analysis toolkit<sup>31</sup>. Identified SNPs included those that were known to be related to  
213 genes of interest and also novel, undescribed SNPs.

214 Genes of interest were identified due to a literature association with the pathology of COPD  
215 and/or as being associated with lung metabolism and/or genes that may be associated with  
216 clinical response to standard of care treatments.

217 Identified SNPs were also cross-referenced with SNPs listed in the Genome Wide Association  
218 Studies (GWAS) Catalog to determine if any SNP had been previously reported in a human  
219 GWAS study and, if so, it was determined if the reported association was relevant to this study.

220 miRNA bioinformatic analysis

221 Quality control was assessed using the quality control metrics from the ArrayQualityMetrics  
222 package in Bioconductor<sup>15</sup> as for the organoculture assay data above.

223 Confounding associations between defined patient demographic parameters and miRNA  
224 expression array data were assessed using pair-wise univariate associations between all  
225 combinations of defined parameters. Associations between categorical parameters were  
226 assessed using a chi-squared test; associations between one categorical and one continuous  
227 parameter were assessed using analysis of variance (ANOVA); associations between two  
228 continuous parameters were assessed using a Spearman correlation test.

229 Data was normalised using quantile normalisation which produces expression measures in a  
230 log base 2 format. Array batch effects due to processing of microarray data in two separate  
231 batches were corrected using the ComBat method<sup>30</sup>.

232 Statistical comparisons were performed to determine if specific miRNAs were associated with  
233 organoculture assay response: the null hypothesis being that no specific differences in miRNA  
234 expression could be detected in patients that responded well in the organoculture assay  
235 compared with patients that did not respond. Linear modelling, empirical Bayesian analysis  
236 and p-value adjustment for multiple testing (Benjamini-Hochberg) was performed using the  
237 Bioconductor Limma software package<sup>14</sup>.

238 miRNAs were annotated based on their experimentally verified target genes from  
239 miRTarBase<sup>32</sup>. miRNAs that displayed significant differential expression (uncorrected p  
240 <0.05), were analysed for enrichment of target gene KEGG (Kyoto Encyclopaedia of Genes  
241 and Genomes) pathway membership using a hypergeometric test. Upregulation and  
242 downregulation of genes were analysed separately.

243 In the same way, miRNA target genes were analysed for enrichment of gene ontology terms.

244

245 Integration of patient demographic, TNF $\alpha$  organoculture response, exome sequence and  
246 miRNA expression data

247 Congruence analysis was performed by evaluating the level of overlap between all data sets.

248 Calculations of significant overlaps were based on a hypergeometric test.

249 All bioinformatic analysis was reviewed by Professor Colin Palmer, University of Dundee.

## 250 **Results**

### 251 **Organoculture Luminex**

252 The majority of COPD patient lung samples responded to treatment with fluticasone,  
253 roflumilast or combination therapy. This was observed as a reduction in the level of TNF $\alpha$   
254 released from the biopsies into the culture media (Fig 2). Different levels of response were  
255 however observed between patients and ranged from modest to a marked reduction in TNF $\alpha$  in  
256 the supernatant.

257

258 **Figure 2: Graphs showing the effects of test articles on TNF $\alpha$  release from stimulated**  
259 **human lung parenchyma biopsies.** N= 25 donors, all diagnosed with COPD. For each donor,  
260 two culture well replicates, each containing two biopsies were included in each treatment  
261 group. Data is displayed as a percentage of the corresponding DMSO control group in both  
262 graphs. A: Bar graph depicting mean + SEM TNF $\alpha$  release. B: Scatter graph depicting  
263 individual patient (dots) and median (thick black line) TNF $\alpha$  release.

264 Fluticasone alone or in combination with rofluminast generated the greatest inhibition of TNF $\alpha$   
265 release. When the effects of monotherapy and combined therapy were compared, there was no  
266 difference in the mean reduction in TNF $\alpha$  levels; however, combined therapy may have  
267 resulted in a bimodal drug response across the patient sample group. Patient samples were  
268 ranked according to the level of treatment response observed in the functional organoculture  
269 assay and a bimodal pattern of response was noted in biopsies treated with roflumilast plus  
270 fluticasone (Fig 4). 12 patient samples were categorised as being high responders and 13 as  
271 low responders to the roflumilast plus fluticasone treatment.

## 272 **Organoculture Bioinformatics**

273 All patient samples passed quality control analysis as described above.

274 Principal component analysis was conducted to explore the relationship between the many  
275 variables.

276 Association analysis of patient demographic parameters and response to roflumilast plus  
277 fluticasone showed that the response was not influenced by any of the patient demographic  
278 factors such as gender or age. Treatment response was noted to be significantly associated with  
279 the first principal component, this indicates that response to roflumilast plus fluticasone is the  
280 primary trend in the data.

281 A strong association was observed between ethnicity and supplier region, this is however  
282 believed to be the result of one sample that was acquired from a geographical region distinct  
283 from all other regions. The ethnicity of this patient was also not replicated in any other sample.

284 Classes of chronic medication appear to be strongly related to each other, this is not surprising  
285 as the standard of care treatment for COPD includes combinations of the classes of drugs  
286 identified. Chronic medication appeared not to influence patient response to roflumilast plus  
287 fluticasone in the organoculture assay and is therefore not thought to be responsible for the  
288 variation in response between patients

289 **Figure 3 Heat map showing the results of patient demographic correlation analysis.** Each  
290 parameter is assessed in relation to each other, the principal components (PC) driving variation  
291 in the data and to the organoculture assay response. Each area within the heatmap denote a p-  
292 value of association between pairs of variables from statistical tests. The statistical tests utilised  
293 depends on the property of the factors: for an association between two categorical factors, a  
294 chi-squared test was used. For an association between a categorical and a continuous factor,  
295 ANOVA was used. For an association between two continuous factors, a Spearman correlation  
296 test was used. In all cases, the resulting p-value was transformed as  $-\log_{10}(p)$  before being  
297 visualised in the confounding factors heatmap.

298

299 **Figure 4. Visualisation of patient-to-patient changes in the relative levels of TNF $\alpha$  after**  
300 **combination treatment of roflumilast (100 nM) and fluticasone (1  $\mu$ M).** The plot shows  
301 histogram bin counts (number of times a value falls within a given bin) as white bars as well  
302 as a smooth density in pink of the log<sub>2</sub> ratios of TNF $\alpha$  release from biopsies treated with  
303 roflumilast plus fluticasone, relative to those treated with DMSO (which also includes LPS and  
304 the vehicle control), across all 25 patients. The average level in the treated biopsies is denoted  
305 by a blue dashed vertical line and the red dashed line denotes zero as this is the average level  
306 in control biopsies.

### 307 **Exome sequence analysis**

308 Preliminary analysis showed that all samples were of good quality, with between 38 and 57  
309 million reads; this resulted in 36,702 to 38,065 SNPs being identified per patient sample.  
310 Merging and filtering of VCF files for high quality SNPs resulted in 101,557 SNPs being  
311 retained for the exome wide association analysis.

312 Hierarchical clustering and principal component analysis identified two patient samples as  
313 outliers. One of the outlying samples is described above and is thought to have resulted in a  
314 slight association with ethnicity and supplier region. There is no explanation for the second  
315 outlying sample, however as the two samples did not show any quality-related discrepancies  
316 both samples were included in downstream analysis.

317 Fisher's exact test, performed in the Plink toolkit, showed that no genotypes corresponding  
318 with the identified SNPs were significantly associated with the organoculture response.  
319 However, to allow a very tentative interpretation of the results, and taking into account the low  
320 number of patients studied, an uncorrected p-value of <0.001 was chosen. With this approach  
321 a total of 30 SNPs, corresponding to 23 genes, were found to correlate with the level of TNF $\alpha$   
322 release upon treatment with roflumilast plus fluticasone. A number of these genes have

323 reported associations with COPD or other pulmonary diseases and include; HEY1<sup>17</sup>,  
324 SMAD3<sup>18</sup>, BARD1<sup>19</sup> and FOXP1<sup>20</sup>

325 CYP2E1 is an inducible drug metabolising enzyme expressed in human lung tissue and has  
326 been implicated in pathological oxidative stress<sup>21,22</sup>. Expression of other CYP2E1 SNPs  
327 including rs3737034 and rs2249695 were also shown to correlate with patient organoculture  
328 response. The significance level was however borderline as determined in the bioinformatic  
329 analysis (p 0.008/0.01).

330 Our findings suggest that genetic variation in the cytochrome p450 enzyme (CYP2E1) gene,  
331 namely SNP (rs2249695), may partly explain the observed variation in drug response. Biopsies  
332 from patients who had at least one copy of the reference allele for this SNP generally responded  
333 better to roflumilast and fluticasone co-treatment. As shown in Figure 5, mean TNF $\alpha$  release  
334 was inhibited by 77.6 % (homozygous reference genotype (TT)) and by 50.74 % (homozygous  
335 alternative genotype (CC)). Levels of inhibition between these two genotypes were found to  
336 be significantly different with a p value of 0.02 (unpaired, two-tailed t-test). The homozygous  
337 reference haplotype has been associated with low CYP2E1 expression<sup>33</sup>.

338 Genetic variation in Mothers against decapentaplegic homolog 3 (SMAD3) gene was also  
339 found to relate to patient organoculture response. As shown in Figure 6, mean TNF $\alpha$  release  
340 was inhibited by 66% (homozygous alternative genotype (GG)) and by 39% (heterozygous  
341 genotype). Levels of inhibition between these two genotypes were found to be significantly  
342 different with a p value of 0.0054 (unpaired, two-tailed t-test). Only two patient samples were  
343 found to have the homozygous reference haplotype (AA) and mean TNF $\alpha$  release was inhibited  
344 by 54 % in this group of patient samples. This level of inhibition was not significantly different  
345 to the homozygous alternative genotype or the heterozygous genotype.

346 The GWAS catalogue contains 624 SNPs identified in the exome sequence analysis, 4 of  
347 these SNPs are annotated in the catalogue as being associated with COPD; 6 have been  
348 associated with asthma and 4 are related to other pulmonary conditions. It was however  
349 found that no SNPs annotated in the catalogue correlated to roflumilast plus fluticasone  
350 response in this study

351 **Figure 5** Graphs showing the relationship between CYP2E1 SNP rs2249695 genotype and  
352 TNF $\alpha$  release from stimulated human lung parenchyma biopsies following roflumilast  
353 and fluticasone co-treatment. Data is displayed as a percentage of the corresponding DMSO  
354 control group. Asterisks indicate significant differences ( $P < 0.05$ , for one,  $P < 0.01$  for two  
355 and  $P < 0.001$  for three). A: Box and whiskers graph depicting TNF $\alpha$  release. The 25th and  
356 75th percentiles of each group are represented by the box with the minimum and maximum  
357 values represented by bars, the line within each box denotes the median value.  
358 B: Bar graph depicting mean + SEM TNF $\alpha$  release.

359 **Figure 6** Graphs showing the relationship between SMAD3 SNP rs1065080 genotype and  
360 TNF $\alpha$  release from stimulated human lung parenchyma biopsies following roflumilast and  
361 fluticasone co-treatment. Data is displayed as a percentage of the corresponding DMSO  
362 control group. Asterisks indicate significant differences ( $P < 0.05$ , for one,  $P < 0.01$  for two  
363 and  $P < 0.001$  for three). A: Box and whiskers graph depicting TNF $\alpha$  release. The 25th and  
364 75th percentiles of each group are represented by the box with the minimum and maximum  
365 values represented by bars, the line within each box denotes the median value.  
366 B: Bar graph depicting mean + SEM TNF $\alpha$  release.

### 367 miRNA analysis

368 RNA quality control analysis showed that isolated RNA was of high purity, 260/280 ratios  
369 ranged from 1.8 to 2.0 and RNA integrity scores ranged from 5.8 to 7.8.



370 All patient samples, except one, passed Agilent miRNA array quality control analysis with a  
371 rating of good to excellent. The remaining sample was flagged for evaluation and removed  
372 from subsequent bioinformatic analysis.

373 Statistical analysis showed that there were no specific differences in miRNA expression  
374 detected in patients that responded well in the organoculture assay compared with patients that  
375 did not respond. This analysis was performed using a p-value that had been adjusted for  
376 multiple statistical testing. For the purposes of this exemplar study, a relaxed p-value  
377 (uncorrected  $p < 0.05$ ) was subsequently applied. At this threshold, 181 miRNAs, mapping to  
378 636 genes, were found to be differentially expressed in COPD patient samples that were high  
379 responders to roflumilast plus fluticasone treatment compared with samples that showed a poor  
380 response. 86 miRNAs were found to be upregulated, correlating with 47 KEGG pathways that  
381 reached statistical significance. This Enrichment analysis highlighted KEGG pathways  
382 associated with TGF- $\beta$  signalling, synaptic function and fatty acid metabolism.

383 95 miRNAs were found to be down regulated correlating with 4 KEGG pathways that reached  
384 statistical significance. This Enrichment analysis highlighted KEGG pathways associated with  
385 long-term depression and serotonergic and GABAergic synaptic function.

386 1,610 GO terms were significantly associated with up-regulated miRNAs and found to be  
387 significantly enriched for pathways associated with cell ageing, specifically telomerase  
388 activity. Pathways involved in synaptic activity and T cell differentiation were also found to  
389 be upregulated.

390 310 GO terms were significantly associated with down-regulated miRNAs and found to be  
391 significantly enriched for pathways associated with B cell receptor activity and TGF- $\beta$   
392 production.

393 As discussed, bioinformatic analysis identified 30 SNPs corresponding to 23 genes ( $p < 0.001$ )  
394 and 181 miRNAs (mapping to 636 genes,  $p < 0.05$ ) as being related to organoculture response.  
395 With further relaxation of the exome analysis  $p$  value to 0.01 congruence analysis found that a  
396 total of 10 genes overlapped between the exome sequence and miRNA expression data and this  
397 overlap is higher than would be expected by chance. Overlapping genes are NTN4, IGF1R,  
398 SMAD3, EGFR, MCL1, FBN1, FGA, APP, MYO10 and IRAK3. Six overlapping genes were  
399 subject to upregulation (SMAD3, EGFR, MCL1, FBN1, FGA & APP) however the remaining  
400 4 overlapping genes did not agree with respect to overlap direction. Absolute minor allele  
401 frequencies from the exome sequence analysis was used as a surrogate for fold changes in the  
402 SNP data. No strong correlations were found between absolute minor allele frequencies and  
403 miRNA log fold-changes. KEGG and GO enrichment analysis of the overlapping genes did  
404 not identify any common pathways or processes.

405 **Figure 7 Venn diagram illustrating the overlap between genes that map to SNPs and**  
406 **miRNAs that are associated with patient COPD biopsy response to roflumilast plus**  
407 **fluticasone.** Patients displayed a good response to treatment, observed by low levels of TNF $\alpha$   
408 release, or a poor response as observed by high levels of TNF $\alpha$  release in the organoculture  
409 assay described.

## 410 Discussion

411 This study aimed to demonstrate the potential of research that combines pre-clinical functional  
412 characterisation of drug efficacy and inter-patient variation in drug responses, with state-of-  
413 the-art genomics and bioinformatics, as a new way to model precision medicine strategies at  
414 the early stages of drug development.

415 COPD is a highly complex condition with many clinical phenotypes. As an exemplar project,  
416 the number of patients was relatively low and findings are therefore tentative, however, this

417 study was also designed to explore the potential for such projects during non-clinical drug  
418 development, where budgets are limited and projects exploring hundreds of patients may be  
419 too costly.

420 Nonetheless, clear variations in drug effectiveness were observed between patients and our  
421 preliminary experimental findings suggest that genetic polymorphisms in COPD patients  
422 may be linked to variation in response to the combination anti-inflammatory treatment,  
423 roflumilast plus fluticasone. A haplotype associated with low CYP2E1 expression was  
424 detected within the cohort of samples that responded well to treatment. It is possible that  
425 CYP2E1 expression influences response to treatment.

426 CYP2E1 induces production of reactive oxygen species<sup>21,23</sup> that may in turn inhibit reductions  
427 of TNF $\alpha$  release by various treatments. All 3 patients in the homozygous reference haplotype  
428 group were high responders to roflumilast plus fluticasone, 5 of 8 patients in the heterozygous  
429 reference haplotype group were high responders whereas 10 of 14 patients in the homozygous  
430 alternative haplotype group were low responders (Fig 5).

431 TGF- $\beta$  and the SMAD signalling pathway have been implicated in the pathology of  
432 COPD<sup>24,25,26</sup> and lung adenocarcinoma<sup>27,28</sup>. Our results show that genetic variation in the  
433 SMAD gene (rs1065080) may influence response to fluticasone plus roflumilast. Patients that  
434 were deemed to be high responders to roflumilast plus fluticasone exclusively displayed the  
435 homozygous alternative genotype (GG), whereas only 5 of 13 patients in the poor response  
436 group displayed this genotype.

437 Roflumilast has been reported to inhibit TGF- $\beta$  driven increases in reactive oxygen species and  
438 phosphorylation of SMAD3 by inhibiting TGF- $\beta$  release<sup>24</sup>. If the genetic variation in SMAD3  
439 and miRNA expression profile reported in this study alters the functioning of the pathway then

440 this may help to explain variation in the observed organoculture response. It was however noted  
441 that no common KEGG or GO pathways were found in the bioinformatic congruence analysis.  
442 The AnalytiXagility platform used by partners to share and interrogate the data could become  
443 a powerful resource to both academic researchers and the pharmaceutical industry.  
444 Aridhia's digital research platform has the potential to link the data generated in this study with  
445 available tissue, DNA and RNA for further research. A platform of this design also offers the  
446 capacity to add patients, analyses and clinical information in real time, thereby tracking patient  
447 outcome and allowing continual remodelling of the data in a secure, version controlled manner.  
448 With ethical approval, it could be possible for researchers in the pharmaceutical industry to  
449 mine for genetic signatures or other parameters within a target disease area, for the purposes of  
450 patient selection and clinical trial support or for identifying the most appropriate pre-clinical  
451 model.

452 The authors acknowledge that while a very high volume of functional and genomics data was  
453 generated, the total number of patients was low for a genomics study; therefore, the scientific  
454 conclusions remain tentative but serve to demonstrate well the potential to explore patient  
455 stratification strategies at a much earlier stage by combining fresh tissue pharmacology, clinical  
456 metadata and genomics.

## 457 **References**

- 458 1. Schork N. Time for one-person trials. *Nature Comment* 2015 Apr; 520: 609-611
- 459 2. Biankin A, Piantadosi S, Hollingsworth SJ. Patient-centric trials for therapeutic development in  
460 precision oncology. *Nature*. 2015 Oct 15;526(7573):361-70

- 461 3. Cook D, Brown D, Alexander R, March R, Morgan P, Satterthwaite G, et al. Lessons learned  
462 from the fate of AstraZeneca's drug pipeline: a five-dimensional framework. *Nat Rev Drug*  
463 *Discov*. 2014 Jun; 13(6): 419-31
- 464 4. LaVallee T. Found in Translation. *European pharmaceutical review*. 2012 Dec; 6:43-45
- 465 5. Ashgar W, El Assal R, Shafiee H, Pitteri S, Paulmurugan R, Demirci U. Engineering cancer  
466 microenvironments for in vitro 3-D tumor models. *Materials today* 2015 Dec;18(10)
- 467 6. Zanoni M, Piccinini F, Arienti C, Zamagni A, Santi S, Polico R et al. 3D tumor spheroid models  
468 for in vitro therapeutic screening: a systematic approach to enhance the biological relevance  
469 of data obtained. *Sci Rep*. 2016 Jan 11;6:19103
- 470 7. Kauffman A Huber W. Microarray data quality control improves the detection of differentially  
471 expressed genes. *Genomics*. 2010 Mar; 95(3): 138-42
- 472 8. Zheng X. Statistical Prediction of HLA Alleles and Related Analysis in Genome-Wide Association  
473 Studies. *Biostatistics* PhD Thesis. 2013 University of Washington
- 474 9. PLINK: a toolset for whole-genome association and population-based linkage analysis  
475 Purcell S et al. 2007 *American Journal of Human Genetics*; 81. Available from  
476 <http://pngu.mgh.harvard.edu/purcell/plink/>
- 477 10. Johnson W.E, Li C, Rabinovic A. Adjusting batch effects in microarray expression data using  
478 empirical Bayes methods. *Biostatistics* 2007 Jan; 8(1): 118-127
- 479 11. Gentleman R.C, Carey V.J, Bates D.M, Bolstad B, Dettling M, Dudoit S, et al. Bioconductor:  
480 open software development for computational biology and bioinformatics. *Genome Biology*.  
481 2004 5(10)
- 482 12. Chou C.H, Chang N.W, Shrestha S, Hsu S.D, Lin Y.L, Lee W.H, et al. miRTarBase 2016: updates  
483 to the experimentally validated miRNA-target interactions database. *Nucleic acids research*  
484 2016 Jan;44(1):239-247

- 485 13. Tilley A.E, Harvey B.G, Heguy A, Hackett N.R, Wang R, O'Connor T.P, et al. Down-regulation of  
486 the Notch Pathway in Human Airway Epithelium in Association with Smoking and Chronic  
487 Obstructive Pulmonary Disease. *Am J Respir Crit Care Med.* 2009 Mar 15; 179(6):457-466
- 488 14. Faura Tellez G, Vandepoele K, Brouwer U, Koning H, Elderman R.M, Hackett T.L, et.al  
489 Protocadherin-1 binds to SMAD3 and suppresses TGF- $\beta$ 1 induced gene transcription. *Am J*  
490 *Physiol Lung Cell Mol Physiol.* 2015 Oct 1;309(7)
- 491 15. Andre P.A, Prele C.M, Vierkotten S, Carnesecchi S, Donati Y, Chambers R.C, et al. BARD1  
492 mediates TGF- $\beta$  signalling in pulmonary fibrosis. *Respir Res.* 2015 Sep 29; 16:118
- 493 16. Foxp 1/2/4-NuRD Interactions Regulate Gene Expression and Epithelial Injury Response in the  
494 Lung via Regulation of Interleukin-6  
495 Chokas A. J. *Bio. Chem.* Feb 2010 285(17) : 13304 – 13313
- 496 17. Linhart K, Bartsch H, Seitz HK. The role of reactive oxygen species (ROS) and cytochrome P-  
497 450 2E1 in the generation of carcinogenic etheno-DNA adducts. *Redox Biol.* 2014; 3: 56-62
- 498 18. Olsson B. Controlled Pulmonary Drug Delivery, *Advances in Delivery Science and*  
499 *Technology.* Chp 2. 2011 DOI: 10.1007/978-1-4419-9745-6\_2
- 500 19. Genotype tissue expression portal. Available at <https://gtexportal.org/home/>
- 501 20. Arif E, Vibhuti A, Alam P, Deepak D, Singh B, Athar M, et al. Association of CYP2E1 and NAT2  
502 gene polymorphisms with chronic obstructive pulmonary disease. *Clin Chim Acta.* 2007 Jul;  
503 382 (1-2): 37-42
- 504 21. Milaria J, Piero T, Serrano A, Guijarro R, Zaragoza C, Tenor H, et al. Roflumilast N-oxide inhibits  
505 bronchial epithelial to mesenchymal transition induced by cigarette smoke in smokers with  
506 COPD. *Pulm PharmacolTher.* 2014 Aug; 28(2): 138-48
- 507 22. Yang T, Ying B, Song X, Zhang S, Fan H, Xu D, et al. Single-nucleotide polymorphisms in SMAD3  
508 are associated with chronic obstructive pulmonary disease. *Exp Biology and Medicine* 2010  
509 May; 235(5): 599-605

- 510 23. Brandsma C.A, Timens W, Jonker M.R, Rutgers B, Noordhoek J.A, Postma D.S. Differential  
511 effects of fluticasone on extracellular matrix production by airway and parenchymal  
512 fibroblasts in severe COPD. Am J Physiol Lung Cell Mol Physiol 2013 Oct; 305(8)
- 513 24. Yu J.R, Tai Y, Jin Y, Hammell M.C, Wilkinson J.E, Roe J.S, et al. TGF- $\beta$ /Smad signalling through  
514 DOCK4 facilitates lung adenocarcinoma metastasis. Genes Dev. 2015 Feb; 29(3): 250-261
- 515 25. Yang H, Wang L, Zhao J, Chen Y, Lei Z, Liu X, et al. TGF- $\beta$ -activated SMAD3/4 complex  
516 transcriptionally upregulates N-cadherin expression in non-small cell lung cancer. Lung cancer  
517 2015 Mar; 87(3): 249-257

518

519 Figure 1

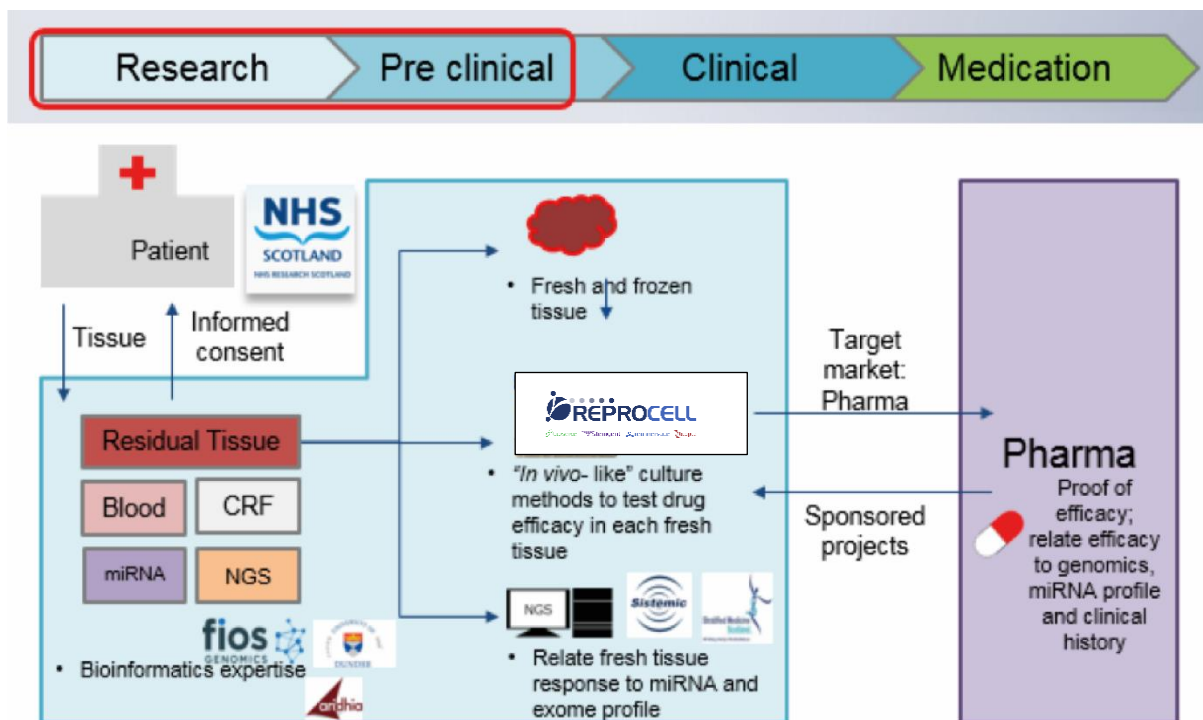

521 Figure 2a

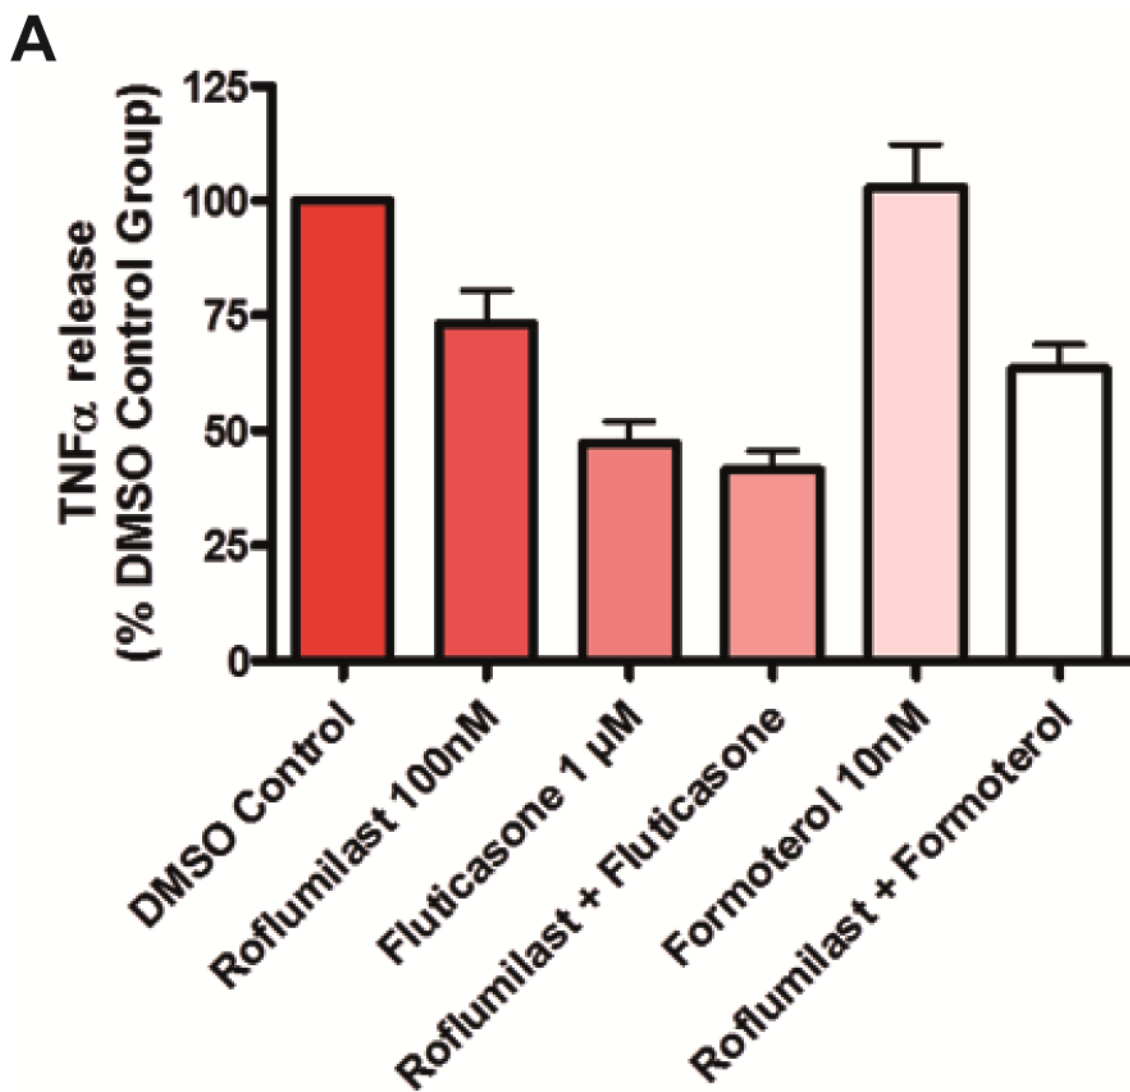

522

523 Figure 2b



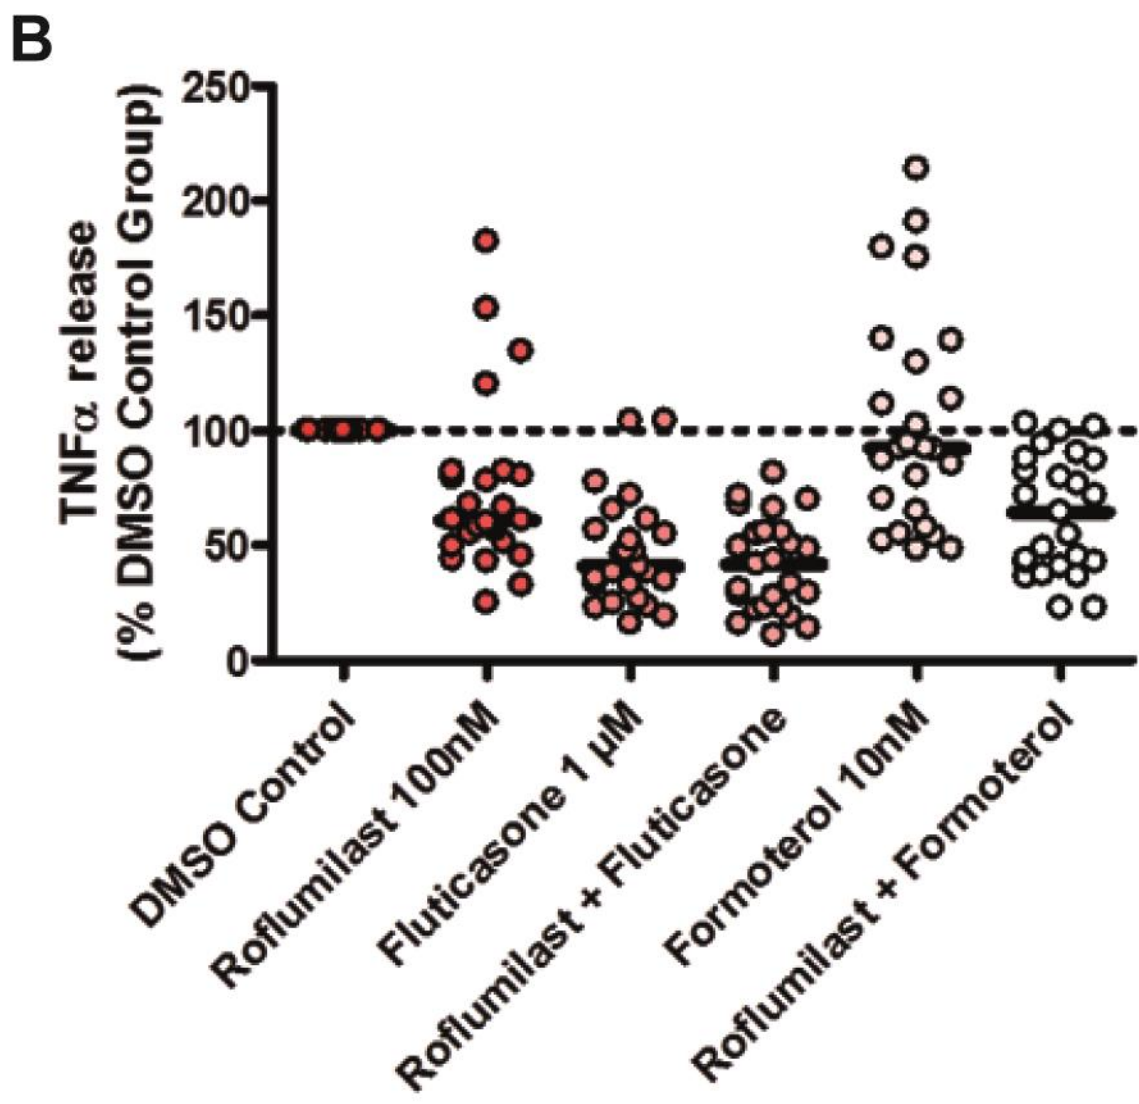

524

525 Figure 3

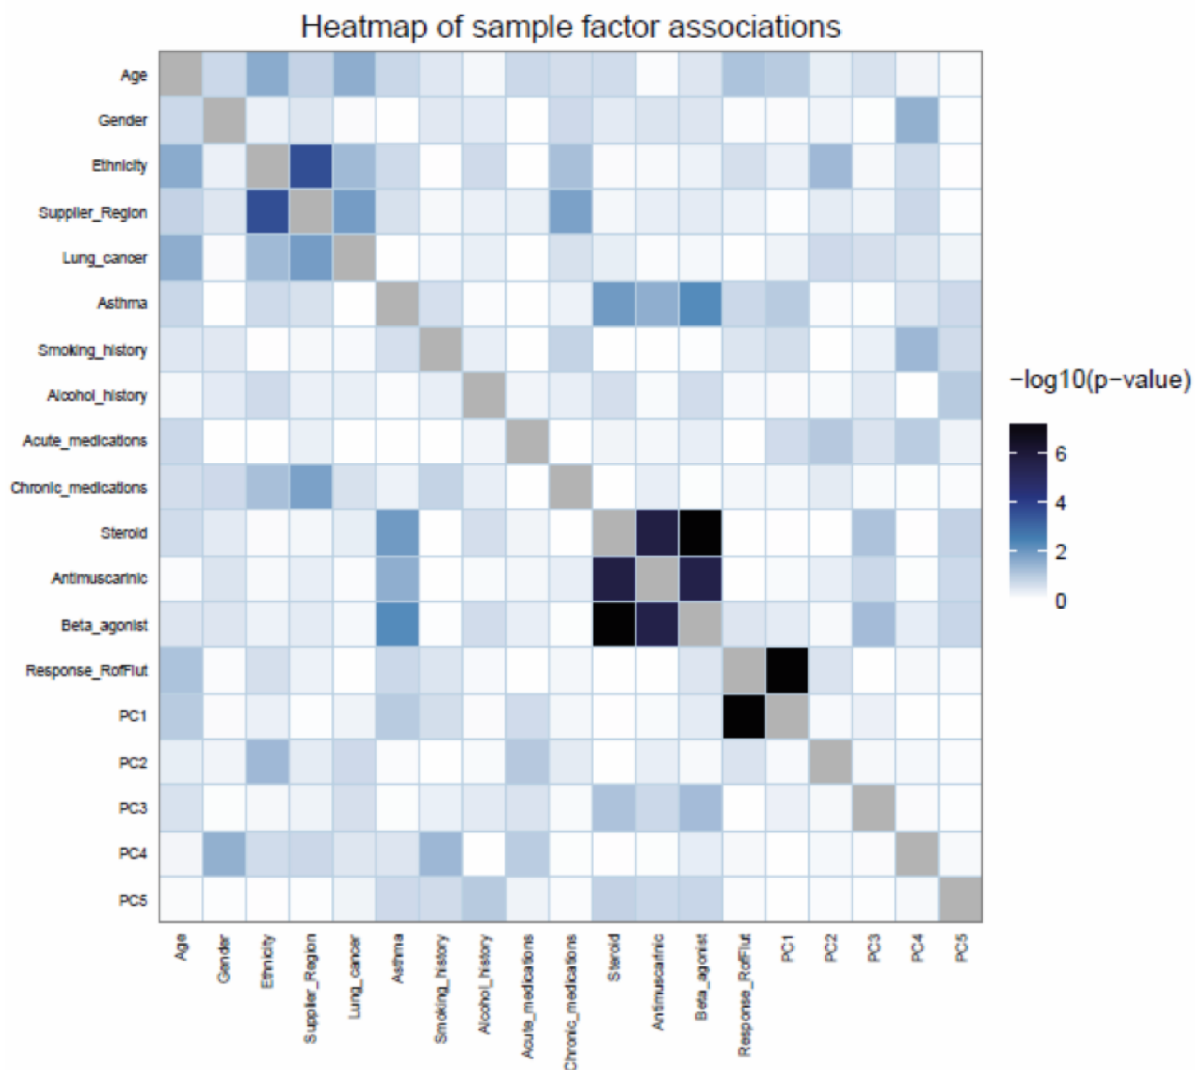

526

527 Figure 4

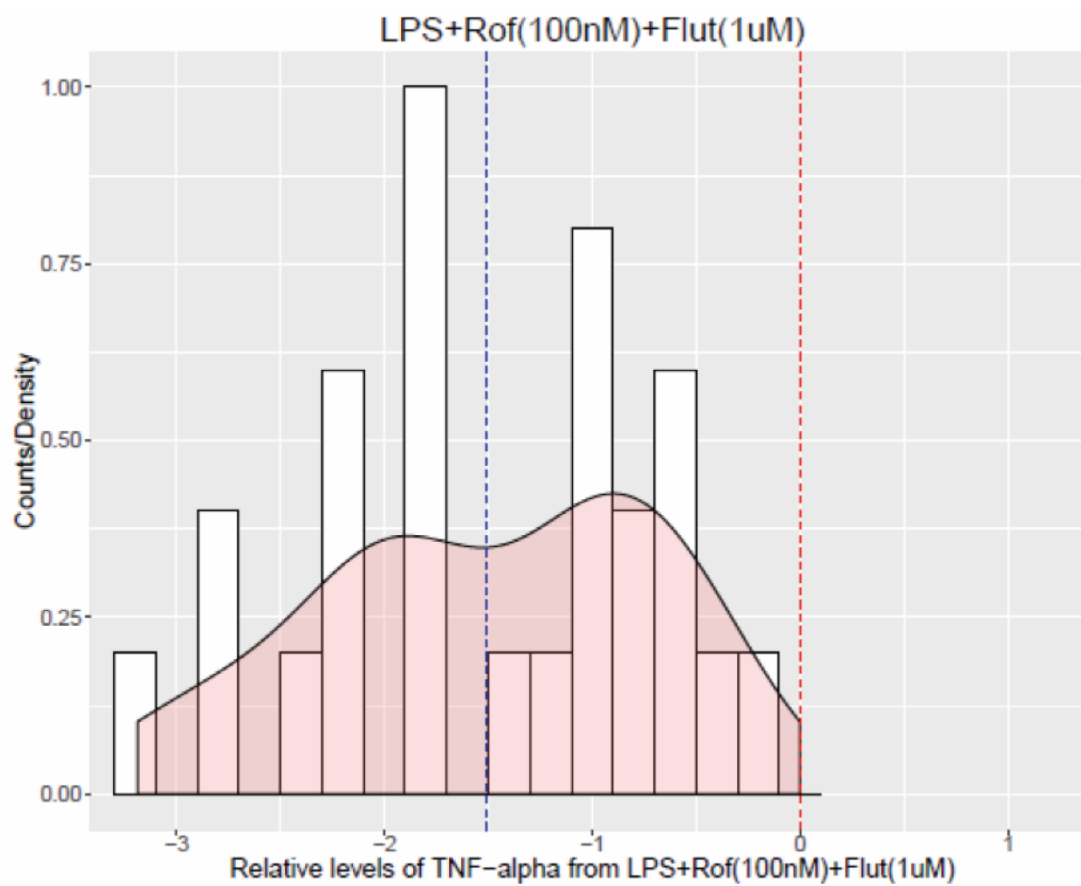

528

529 Figure 5a

A

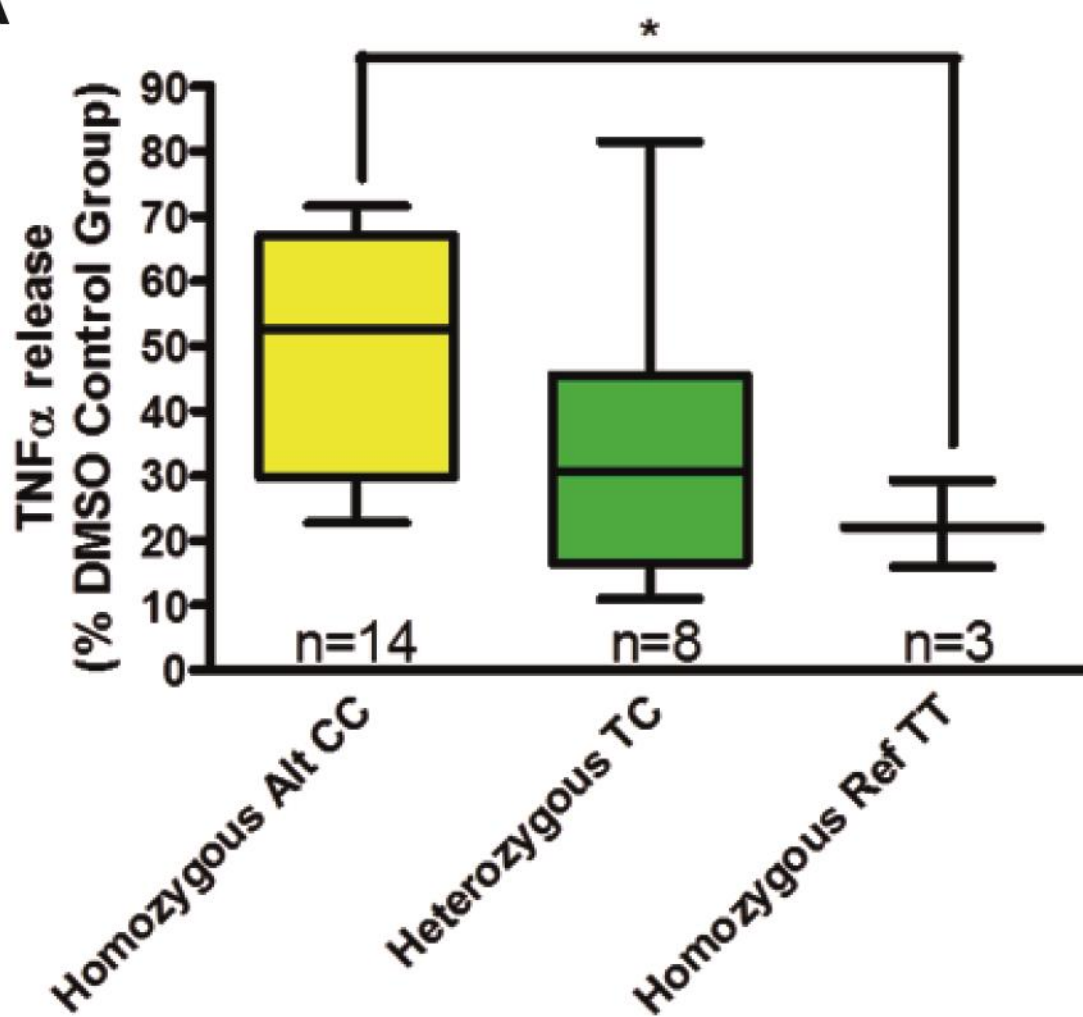

530

531 Figure 5b

**B**

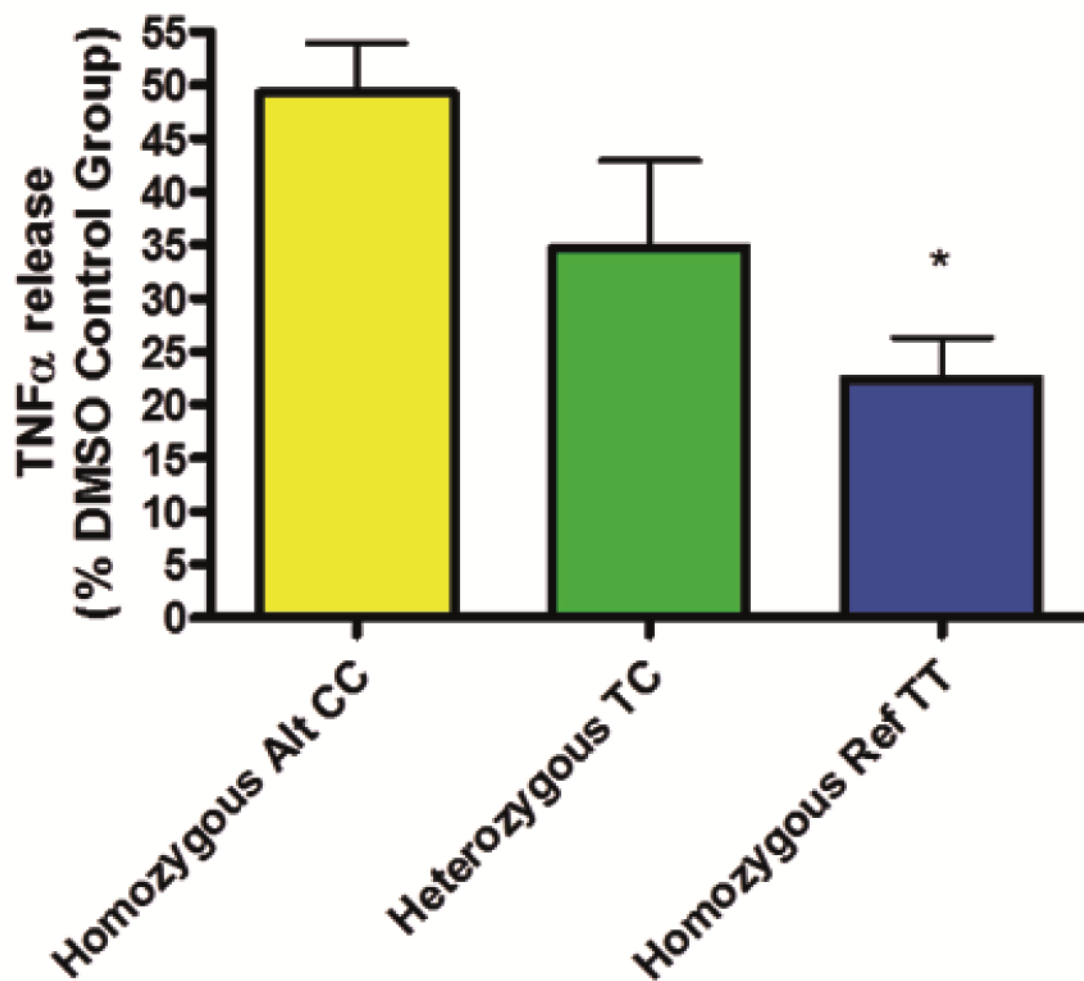

532

533 Figure 6a

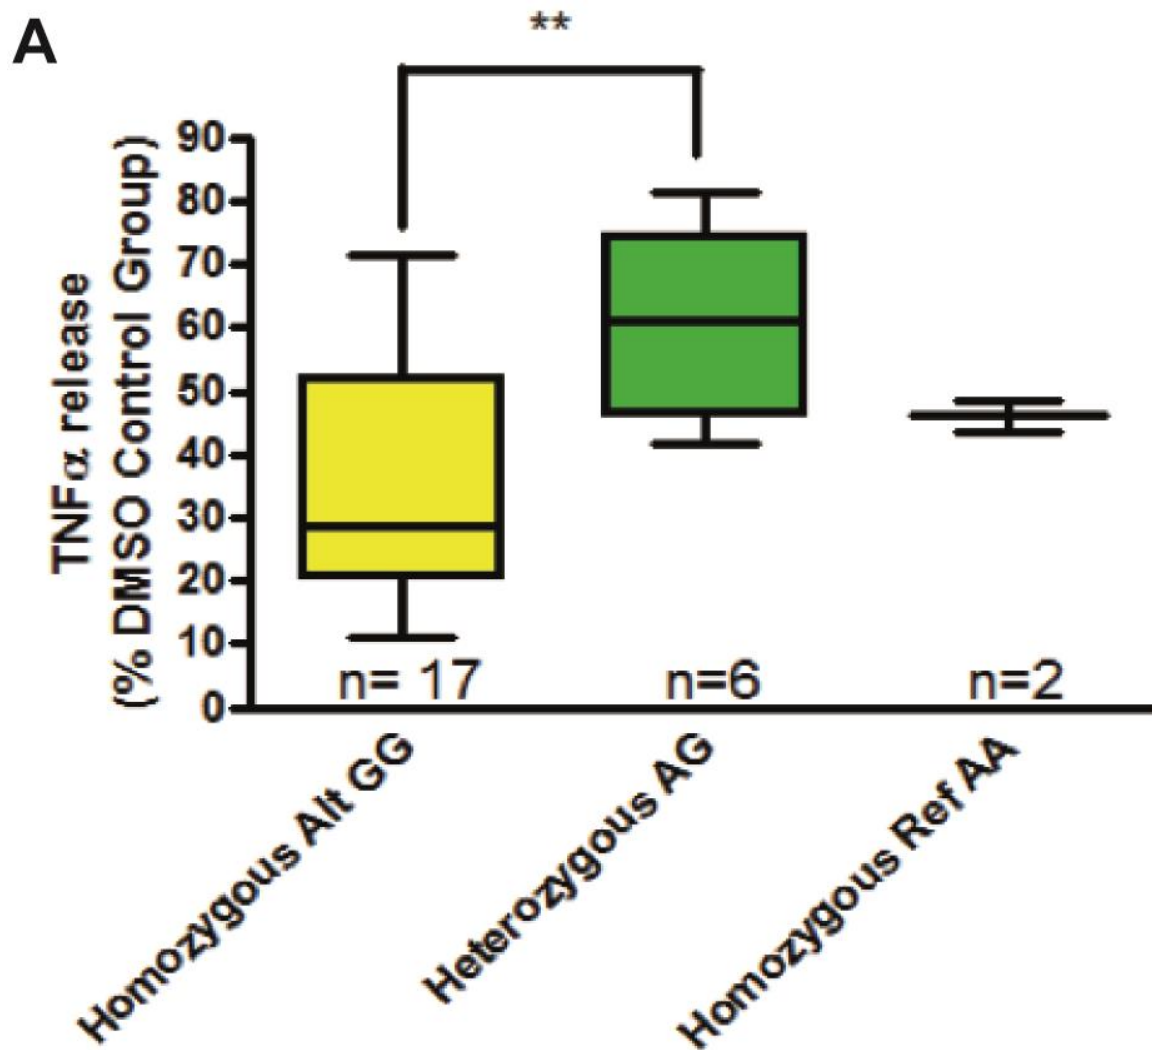

534

535 Figure 6b

**B**

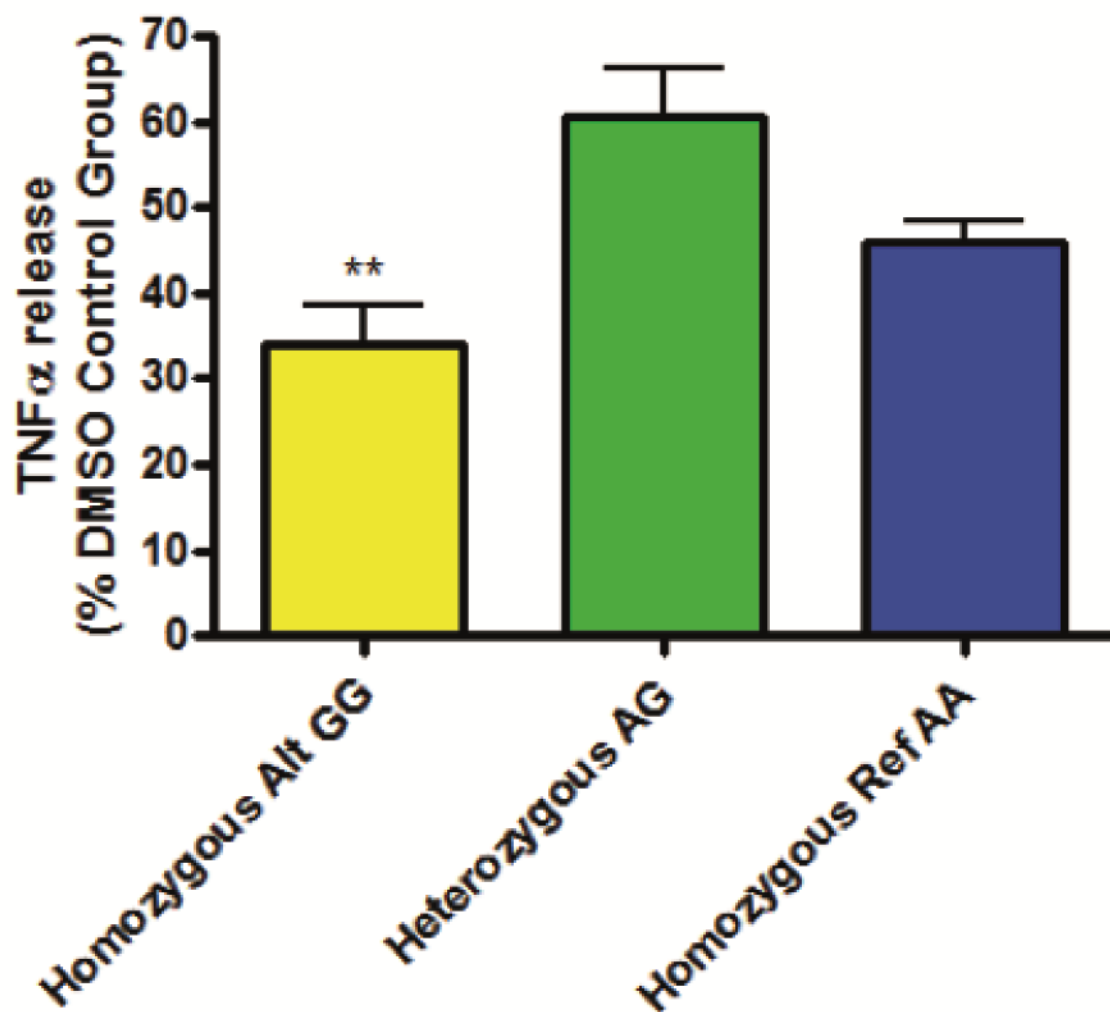

536

537 Figure 7

miRNA: RofFlut high vs low

GWAS: RofFlut high vs low

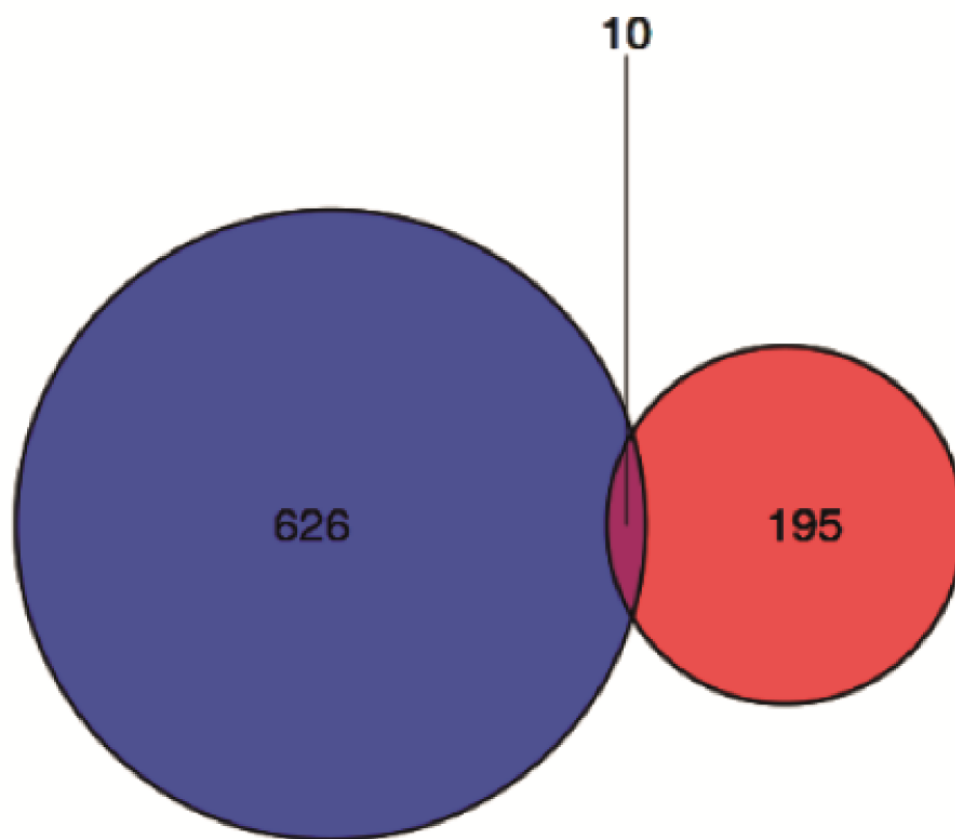

538
